# Supplementary material for: Loss-of-Function Mutations in TRAF7 and KLF4 Cooperatively Activate RAS-Like GTPase Signaling and Promote Meningioma Development
Source: Oxford University Press journal article supplement (doi:10.1158/0008-5472.can-20-3669), 2021-07-02
Supplement: 00085472can203669-sup-254777_3_supp_7214197_qv9p42.pdf [file 00085472can203669-sup-254777_3_supp_7214197_qv9p42.pdf]

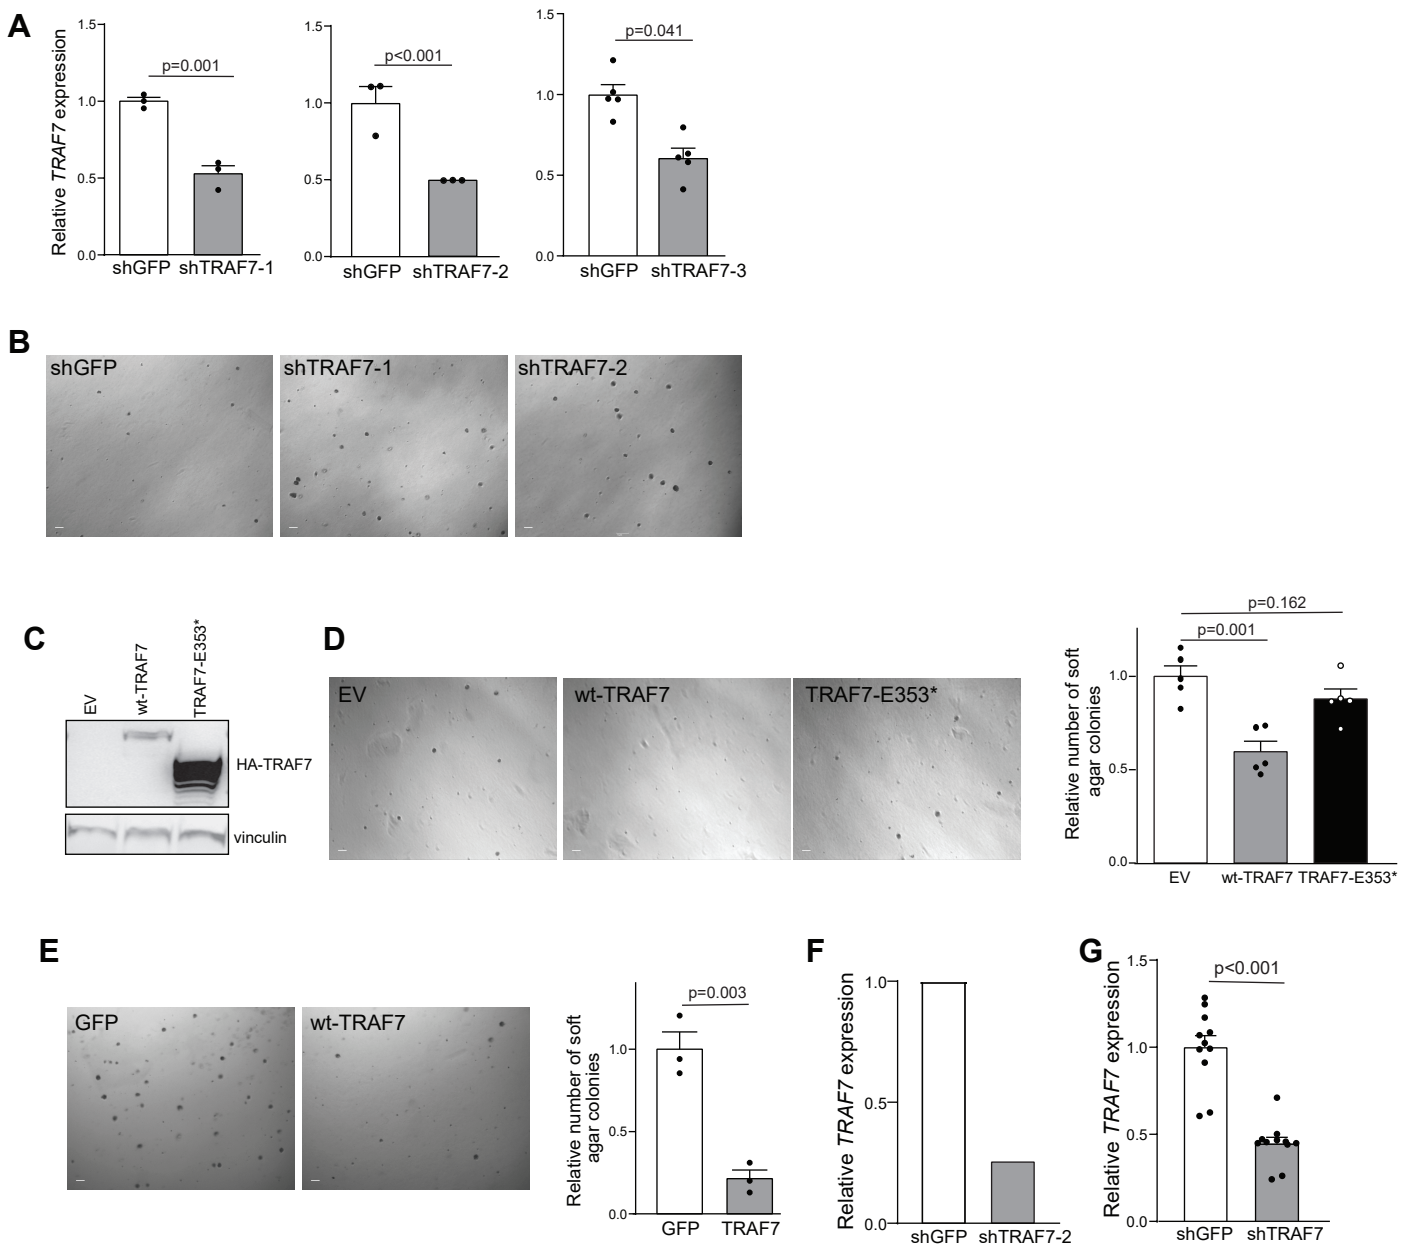

**Figure S1. TRAF7 functions as a tumor suppressor in meningeal cells.** **A**, RT-qPCR analysis of *TRAF7* expression in HMCs expressing shRNA targeting *GFP* or *TRAF7*. Values are means  $\pm$  SEM;  $n \geq 3$ . P value is calculated by a two-sided unpaired Student's t test. **B**, Images of AI colonies of HMCs expressing shRNA against *GFP* or *TRAF7* in soft agar. Scale bar, 100  $\mu$ m. **C**, Immunoblotting analysis of HMCs expressing an empty vector (EV), wt-*TRAF7*, or *TRAF7-E353\** mutants. **D**, Images of AI colonies of HMCs expressing EV, wt-*TRAF7*, or *TRAF7-E353\** in soft agar. Scale bar, 100  $\mu$ m. Relative AI growth is shown as means  $\pm$  SEM;  $n \geq 3$ . P values are calculated by a two-sided Student's t test. **E**, Images of AI growth of CH157-MN cells expressing GFP or wt-*TRAF7* in soft agar. Scale bar, 100  $\mu$ m. Relative AI growth is shown as means  $\pm$  SEM;  $n=3$ . P values are calculated by a two-sided Student's t test. **F**, RT-qPCR analysis of *TRAF7* expression of CH157-MN cells expressing shGFP or sh*TRAF7-2*.  $n=1$ . **G**, RT-qPCR analysis of *TRAF7* expression of HMCs expressing shGFP or sh*TRAF7-1* and sh*TRAF7-2*. Values are means  $\pm$  SEM,  $n > 10$ . P values are from a two-sided unpaired Student's t test.

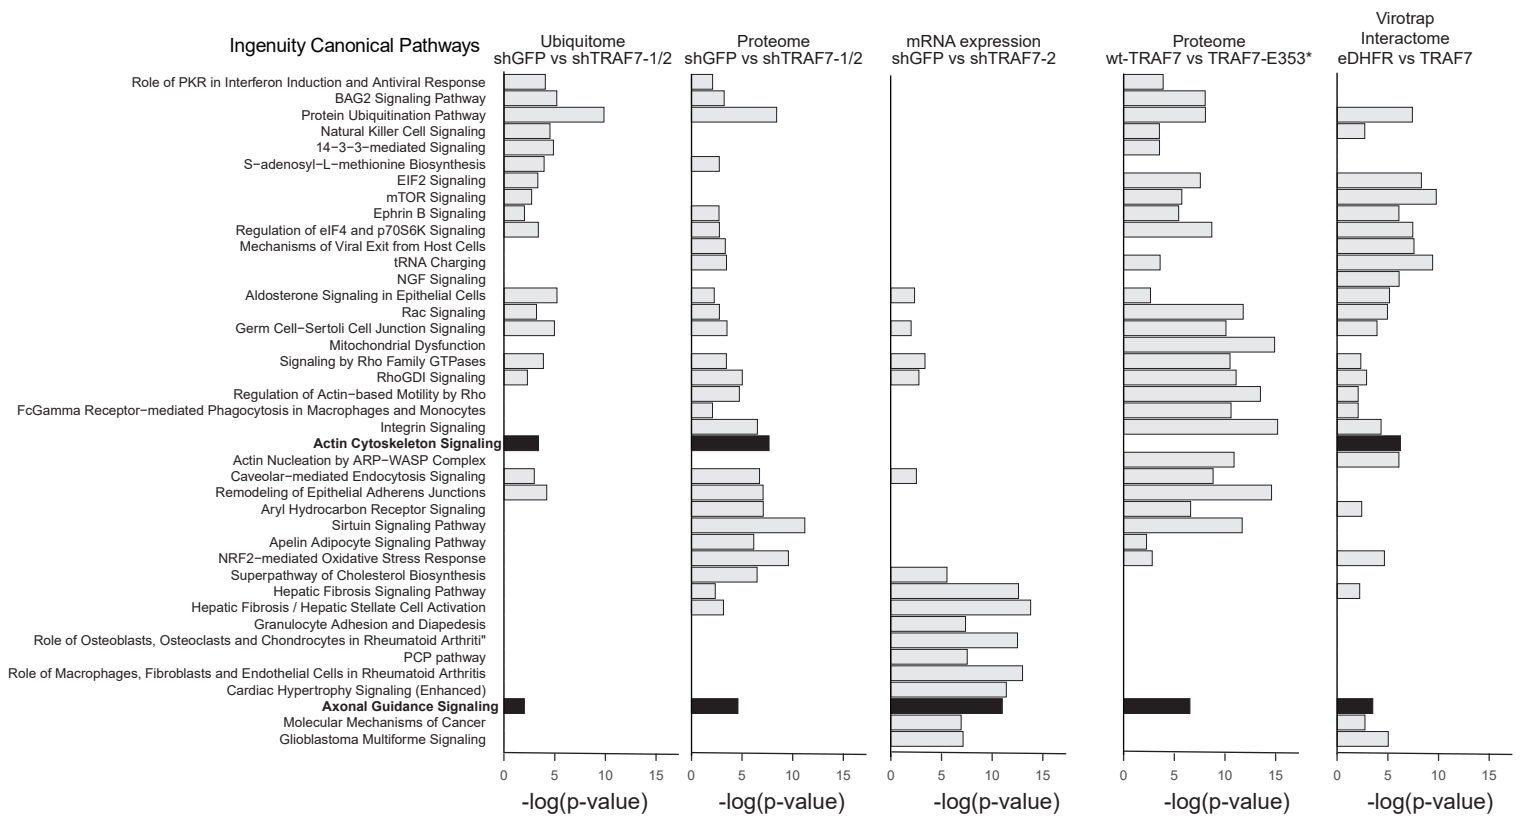

**Figure S2. Canonical IPA pathways modulated by TRAF7.** Ingenuity Pathway Analysis (IPA) of TRAF7-mediated alterations and TRAF7 interactome. Top 10 significantly enriched pathways for each of the datasets are shown. P value < 0.01 was used to determine the significance. The  $-\log_{10}(\text{P value})$  was not shown if the pathway was not significantly enriched.

**A**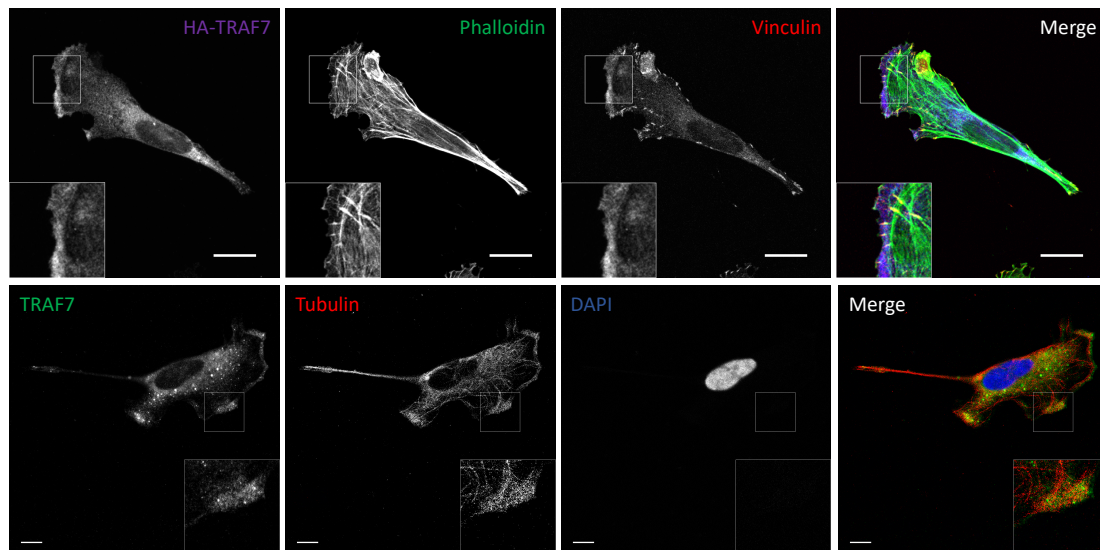**B**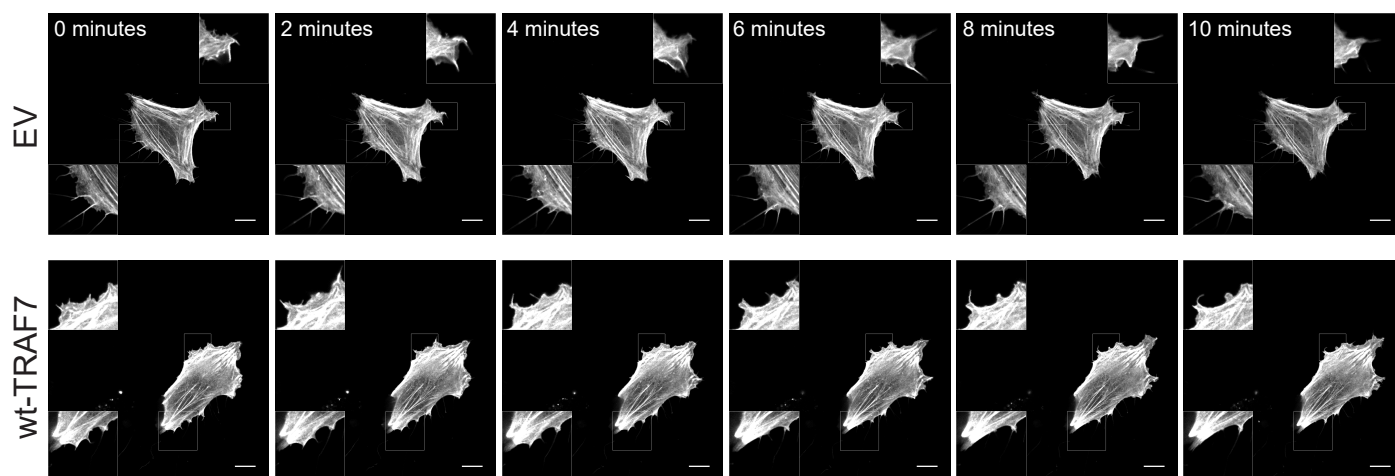

**Figure S3. TRAF7-mediated alterations of actin dynamics.** **A**, Immunostaining of HMC expressing HA-TRAF7 with anti-HA, anti-vinculin, or anti-tubulin antibodies, and phalloidin. Scale bar, 10 μm. **B**, Human meningeal cells expressing an empty vector (EV) or TRAF7 were transiently transfected with tdTomato-Lifeact-7 and imaged in real time by confocal microscopy for over 10 min. Scale bar, 10 μm.

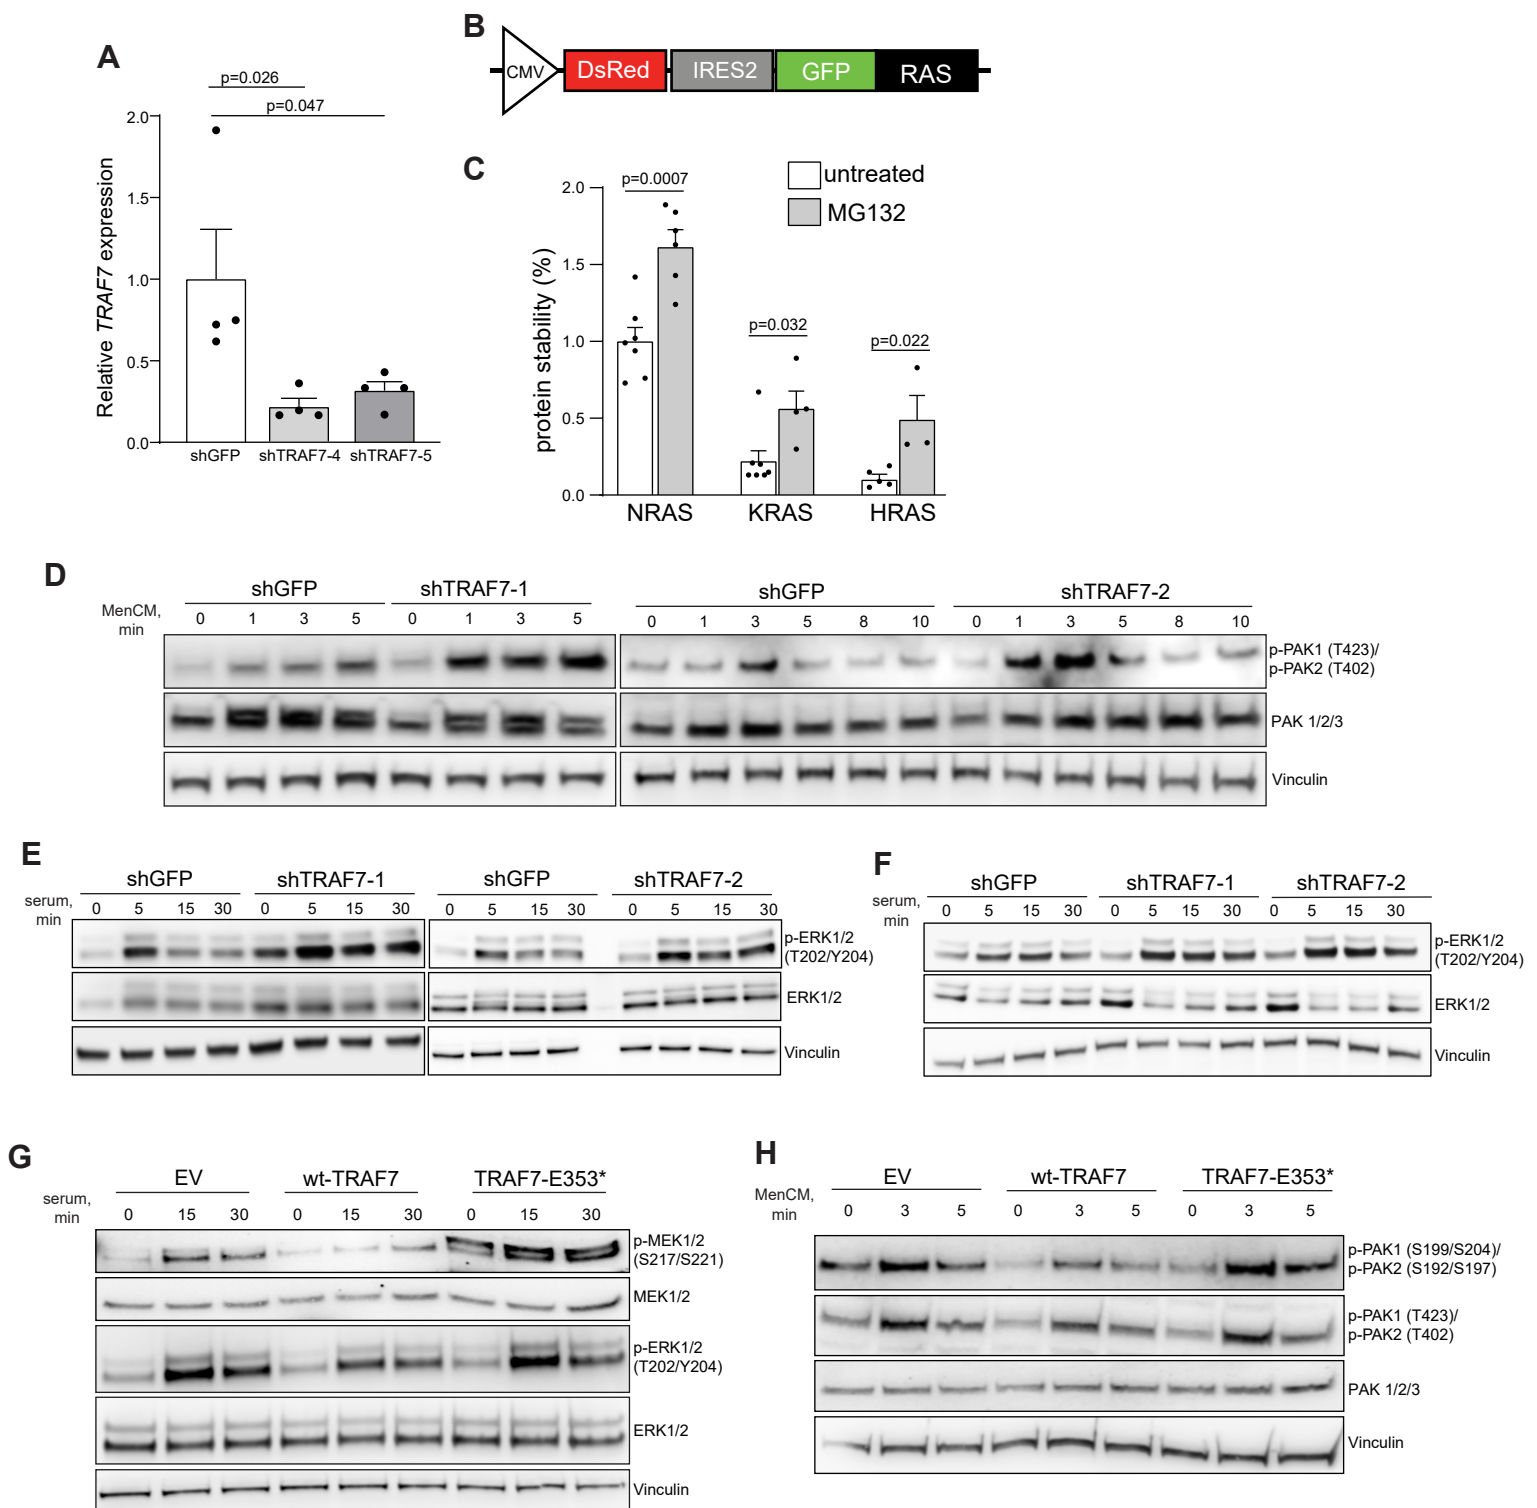

**Figure S4. TRAF7 regulates proteostasis and activity of the RAS-like GTPases.** **A**, RT-qPCR analysis of *TRAF7* expression in HEK293T cells expressing shRNAs targeting *GFP* or *TRAF7*. Values are means  $\pm$  SEM;  $n=4$ . P values are from one-way ANOVA. **B**, Schematic representation of the stability reporter system containing DsRed, followed by the IRES sequence and GFP-fused RAS isoforms or CDC42. **C**, Global protein stability (GPS) analysis of relative levels of RAS proteins in HEK293T cells in the absence or presence of MG132 (48 hours). Values are means  $\pm$  SEM;  $n \geq 3$ . P values are from a two-sided unpaired Student's *t* test. **D**, Serum-starved HMCs expressing shRNA against *GFP* or *TRAF7* were stimulated with MenCM for the indicated time periods. Immunoblotting analysis using the indicated antibodies. **E**, Serum-starved HMCs expressing shRNA against *GFP* or *TRAF7* were stimulated with 2% serum for the indicated time periods. Immunoblotting analysis using the indicated antibodies. **F**, CH157-MN cells expressing shGFP or shTRAF7 were serum-starved overnight, and then stimulated with 10% serum for the indicated time periods. Immunoblotting analysis was performed using the indicated antibodies. **G**, HMCs expressing an empty vector (EV), wt-TRAF7, or TRAF7-E353\* mutant were serum-starved overnight, and then stimulated with 2% serum for the indicated time periods. Immunoblotting analysis was performed using the indicated antibodies. **H**, HMCs expressing EV, wt-TRAF7, or TRAF7-E353\* mutant were serum-starved overnight, and then stimulated with MenCM, (Meningeal Cell Medium) for the indicated time periods. Immunoblotting analysis was performed using the indicated antibodies.



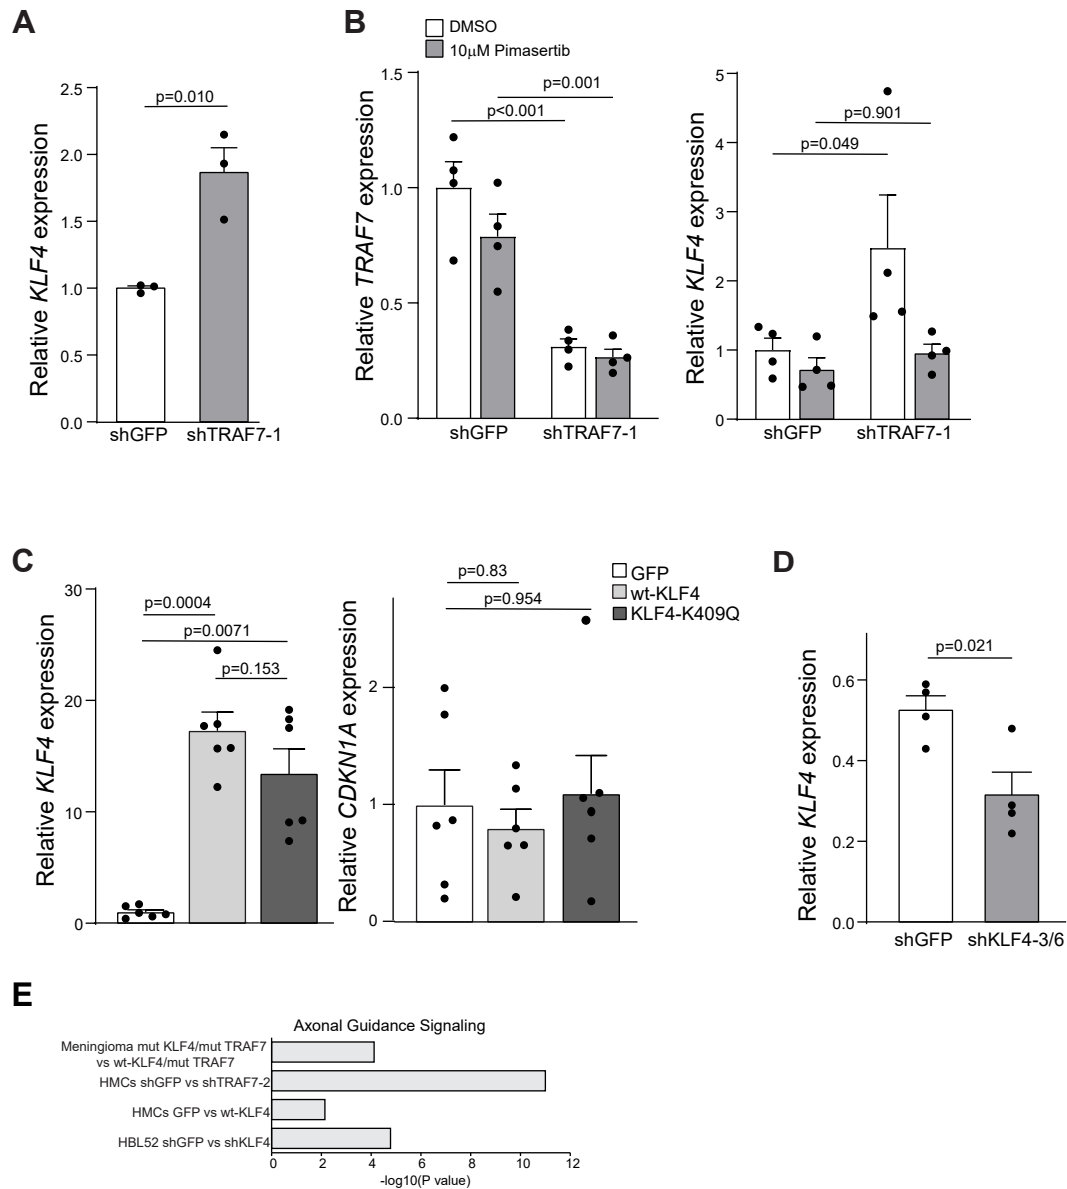

**Figure S5. TRAF7 loss of function promotes *KLF4* expression.** **A**, RT-qPCR analysis of *KLF4* expression in human meningeal cells expressing shGFP or shTRAF7-1. Values are mean  $\pm$  SEM.  $n=3$ . P values are from two-sided unpaired Student's t test. **B**, RT-qPCR analysis of *KLF4* and *TRAF7* expression in CH157-MN cells expressing shGFP or shTRAF7-1 treated with DMSO or Pimasertib (10  $\mu$ M, 48 hours).  $n=4$ . P values are from two-way ANOVA. **C**, RT-qPCR analysis of *KLF4* and *CDKN1A* expression in human meningeal cells expressing GFP, wt-KLF4, or KLF4-K409Q. Values are mean  $\pm$  SEM.  $n=6$ . P values are from one-way ANOVA. **D**, RT-qPCR analysis of *KLF4* expression in HBL-52 cells expressing shRNA targeting GFP or *KLF4*. Values are mean  $\pm$  SEM.  $n=4$ . P values are from two-sided unpaired Student's t test. **E**, The Axonal Guidance Pathway alterations in the indicated data-sets.

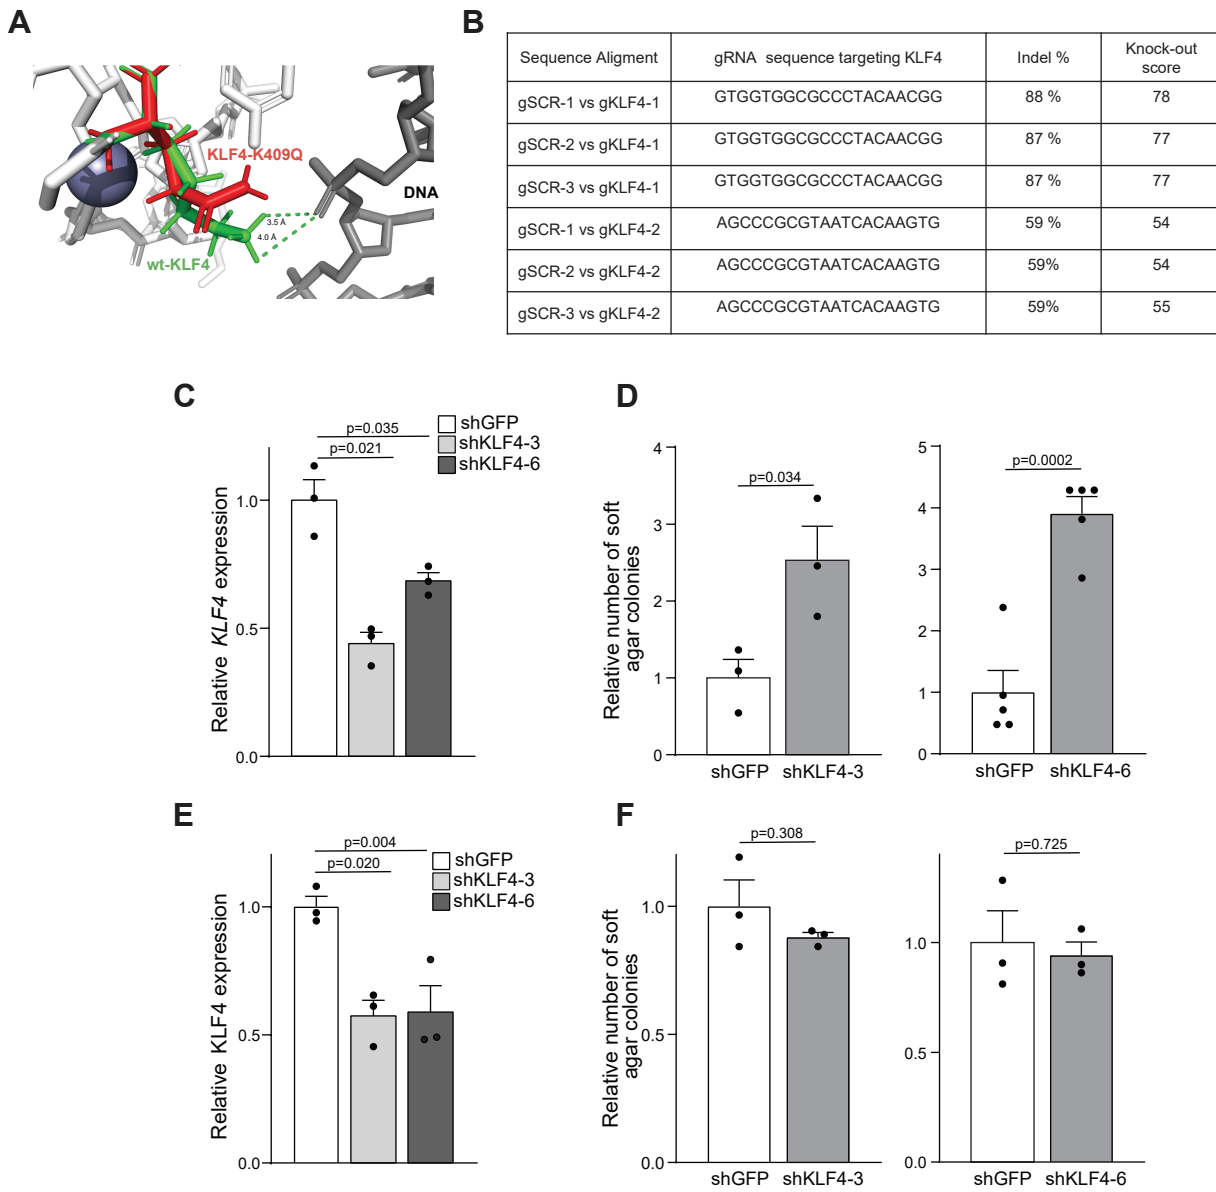

**Figure S6. KLF4 promotes transformation of *TRAF7* mutated cells. **A**, PYMOL in-silico modelling showing interaction between K409 in wt-KLF4 (PDB: 2WBU) or Q409 in KLF4-K409Q mutant and DNA. **B**, Indel efficiency in HMCs expressing the indicated Scramble gRNAs (gSCR) or gRNAs targeting *KLF4* (gKLF4) determined the ICE v2 CRISPR Analysis Tool. **C**, RT-qPCR analysis of *KLF4* expressions in HBL-52 cells expressing shRNA against *GFP* or *KLF4*. Values are mean  $\pm$  SEM.  $n=3$ . P values are calculated by two-sided unpaired Student's t test. **D**, Anchorage independent growth of HBL-52 cells expressing the indicated constructs. Values are means  $\pm$  SEM.  $n=3$ . P values are from two-sided unpaired Student's t test. **E**, RT-qPCR analysis of *KLF4* expressions in HMCs expressing shRNA against *GFP* or *KLF4*. Values are mean  $\pm$  SEM.  $n=3$ . P values are calculated by two-sided unpaired Student's t test. **F**, Anchorage independent growth of HMCs expressing shRNA against *GFP* or *KLF4*. Values are means  $\pm$  SEM.  $n=3$ . P values are from two-sided unpaired Student's t test.**

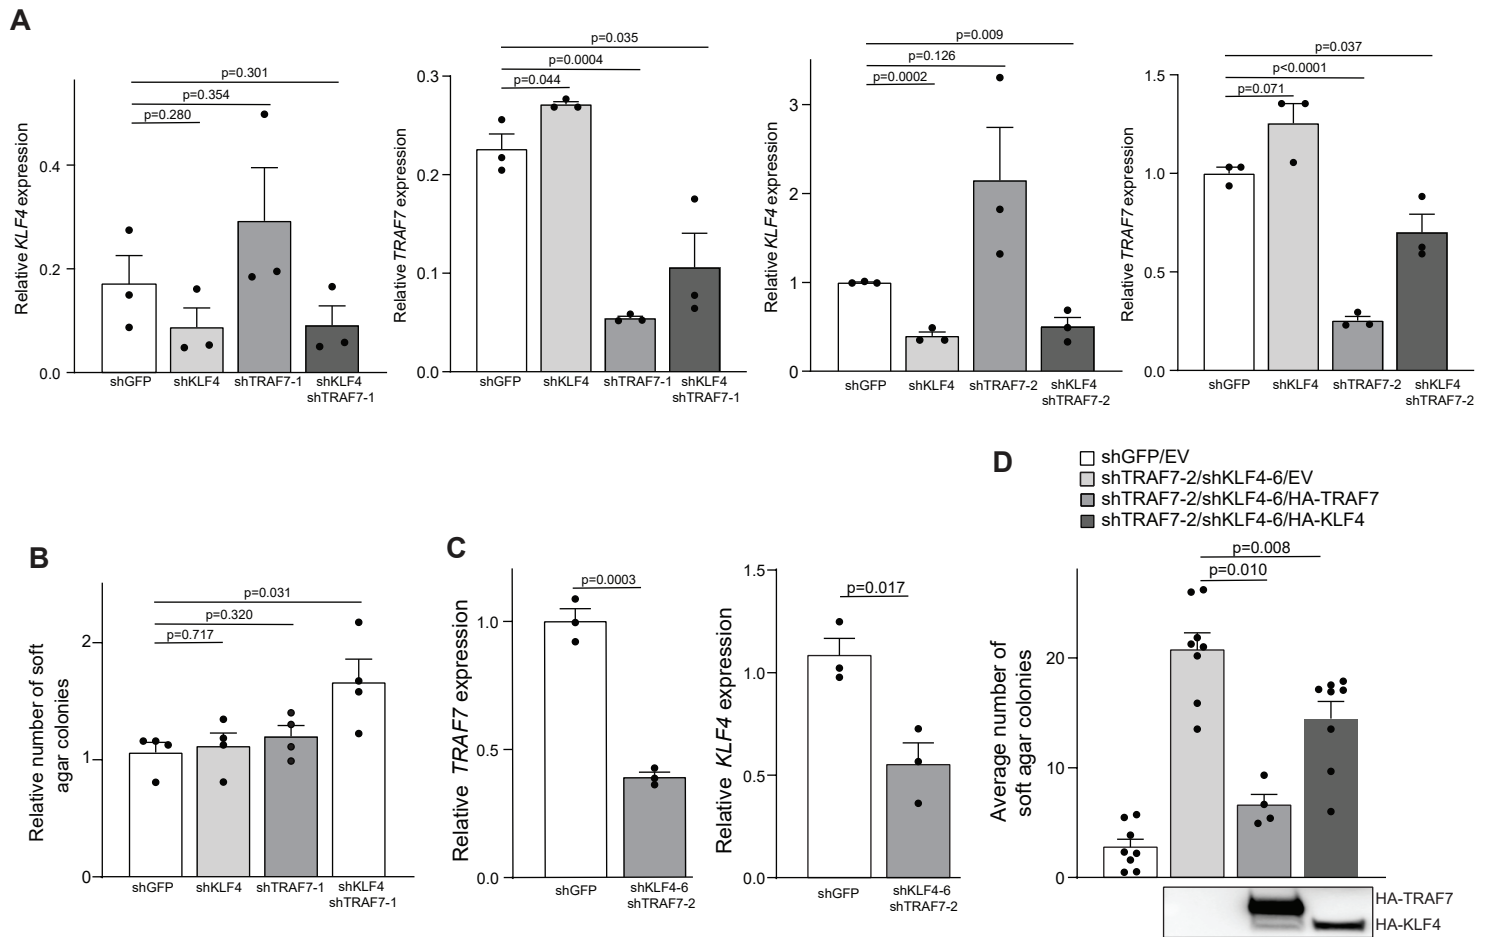

**Figure S7. TRAF7 and KLF4 cooperates to promote tumorigenic transformation.** **A**, RT-qPCR analysis of *KLF4* or *TRAF7* expressions in CH157-MN cells expressing the indicated constructs. Values are mean  $\pm$  SEM.  $n=3$ . P values are from two-sided unpaired Student's t test. **B**, Anchorage independent growth of CH157-MN cells expressing the indicated constructs. Values are means  $\pm$  SEM.  $n=4$ . P values are from two-sided unpaired Student's t test. **C**, RT-qPCR analysis of *KLF4* or *TRAF7* expressions in CH157-MN cells expressing the indicated constructs. Values are mean  $\pm$  SEM.  $n=3$ . P values are from two-sided unpaired Student's t test. **D**, Anchorage independent growth of CH157-MN cells expressing the indicated constructs. Values are means  $\pm$  SEM.  $n \geq 4$ . P values were detected by two-way ANOVA. Immunoblot analysis showed overexpression of HA-TRAF7 or HA-KLF4 using anti-HA antibodies.
